# Supplementary material for: Photoinduced electron transport in dye-containing titania gel films
Source: Royal Society of Chemistry journal article supplement (doi:10.1039/c2ra00495j), 2012-01-01

Fig. S1 Photocurrent density values of the electrodes, the untreated and steam-treated WE-FC3, obtained as a function of light irradiation time. The photocurrent density for each electrode was normalized at each initial value.

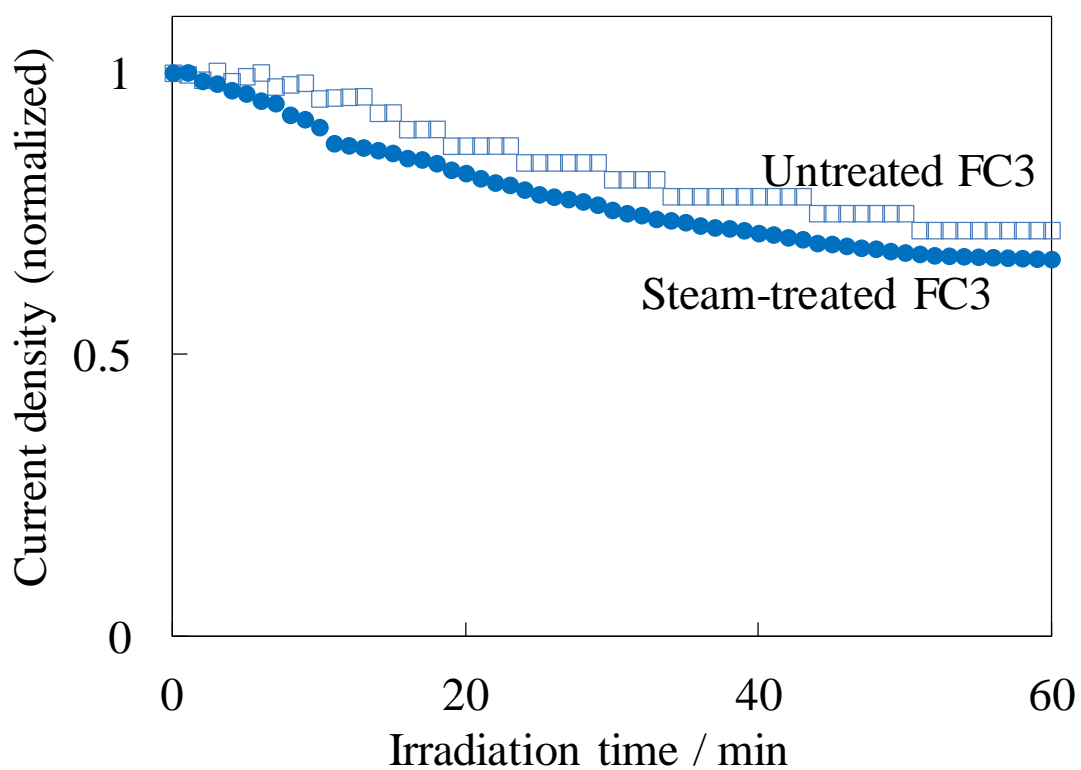

Supplement: c2ra00495j.pdf [file c2ra00495j.pdf]
